# Supplementary material
Source: publisher figshare collection journal article supplement (https://gsajournals.figshare.com/ndownloader/files/13703630)
Supplement: Supplementary file 1 [file 13703630]

SUPPLEMENTAL TABLE LEGENDS

**Supplemental Table 1. Oligos**. Oligos listed were used in the excecution of this paper, 5’-🡪3’.

| **Primers (5' -- 3')** |  |  |
| --- | --- | --- |
| **Forward** | **Reverse** | **Purpose** |
| CGGAGCTGAACATCACGTTT | GTGGATTCTGTGCACGATGA | *wnt4a* fluorescent in situ |
| AGTGTTCCCCAAAAGCCTCT | GAGAAGCTGCGAGGACTCAT | uc55 and uc56 PCR ID |
| GCTGCAAGTTCCACTGGT | CTATGGGTGGGCGTGGTC | fh294 PCR ID |
| TCTGGAGGACTGTGTAAGAGGTATGC | AGACGCACAATCTTGAGAGCAG | rpl13a RT |
| TCTGAGTCCACACGTTTCCTG | TCTCATCCTGTGGAATTCTGTGAC | amh RT |
| CAGCCAGCAAGTTCAGTGAG | CGCACTTTACTCAGGCCAAT | Vasa RT |
| AGATGTCGAGTTAAAGATCCTGCA | CGACCGGGTGAAAACGTAGA | cyp19a1a RT |
| GCTCTTTCTAGCGCTCTTCTC | GTCACTGCAAATGCTACGCT | *wnt4a* RT-PCR |
| GTCAAGACCTGCTGGAAAGC | CTTGCGACACTGTTTGCATT | fh294 PCR ID |
| GCTGCAAGTTCCACTGGT | CTATGGGTGGGCGTGGTC | fh295 HRMA ID |
| CCGCAACCGCCGATGGAACT | ACCGGGCGTTCTGGGGTCAT | *wnt4a* color in situ |
| AAGGTCATGCCTCCATTCCG | AACCGCGAGGTTCCATTACA | wnt4b RT-PCR |

**Supplemental Table 2. Genotypic ratios of *wnt4a* mutants were normal.** The ratio of wild-type : heterozygous : mutant was not significantly different from expected Mendelian ratios, 1:2:1, consistent with normal survival.

|  | Number of Wild-types | Number of Heterozygotes | Number of Mutants | Resulting Ratio | Chi-square test |
| --- | --- | --- | --- | --- | --- |
| **fh295** | 56 | 124 | 51 | 1 : 2.21 : 0.91 | P = 0.48 |
| **fh295** | 162 | 307 | 143 | 1 : 1.90 : 0.88 | P = 0.55 |
| **uc55** | 103 | 202 | 119 | 1 :1.96 : 1.16 | P = 0.34 |
| **uc56** | 109 | 208 | 79 | 1 : 1.91 : 0.72 | P = 0.06 |

SUPPLEMETNAL FIGURE LEGENDS


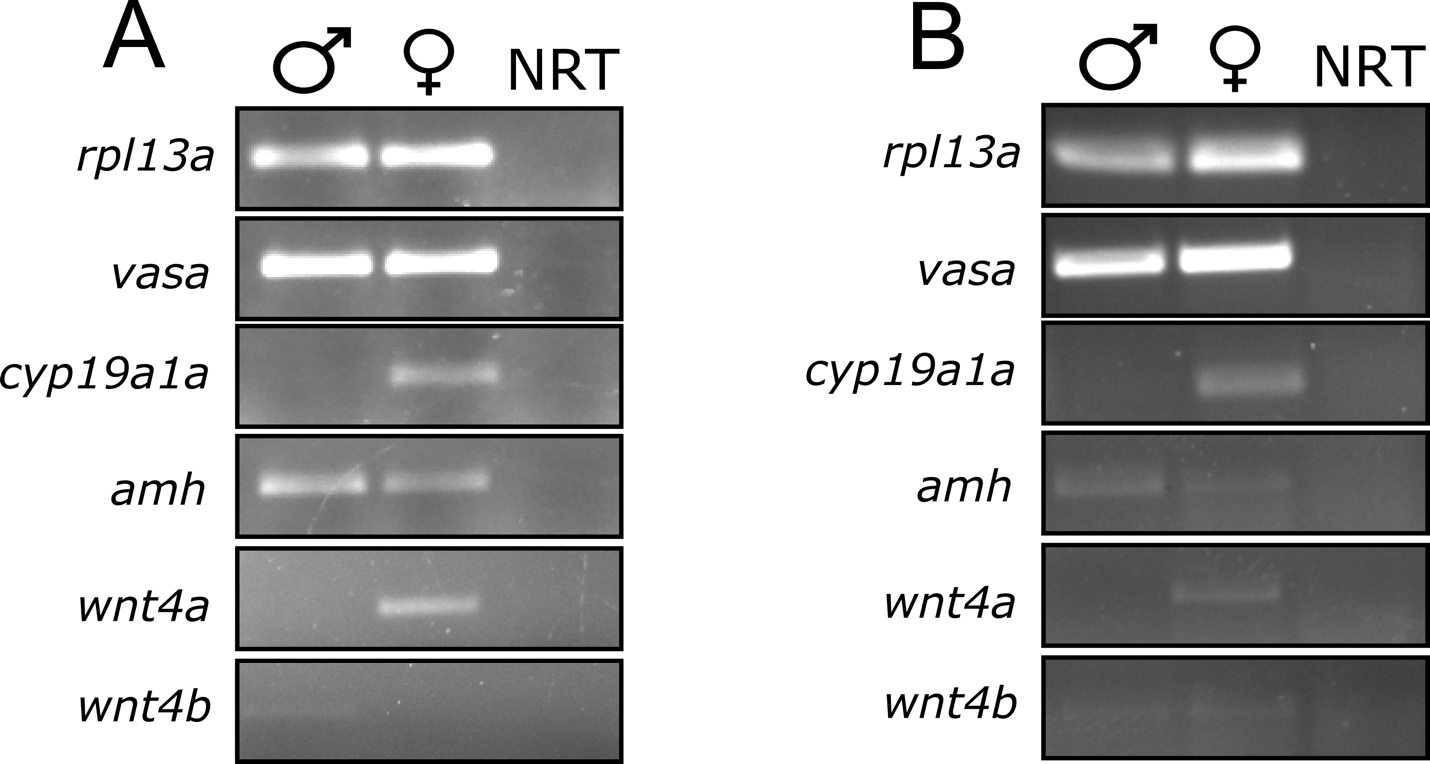


**Supplemental Figure 1. In zebrafish gonads, *wnt4a* expression is female specific.** RT-PCR analysis of gene expression in adult (90dpf) (A) and juvenile (30dpf) (B) gonads. The germ cell-specific gene *vasa* was detected in both ovaries and testes. The female-specific gene *cyp19a1a* was detected in only ovaries while the male-enriched gene *amh* was detected at slightly higher levels in testes compared to ovaries. Expression of *wnt4a* was only detected in ovaries, while *wnt4b* transcript appeared faintly in the testies. The ribosomal protein gene *rpl13a* is ubiquitously expressed used here as loading control. NRT, no reverse transcriptase control.


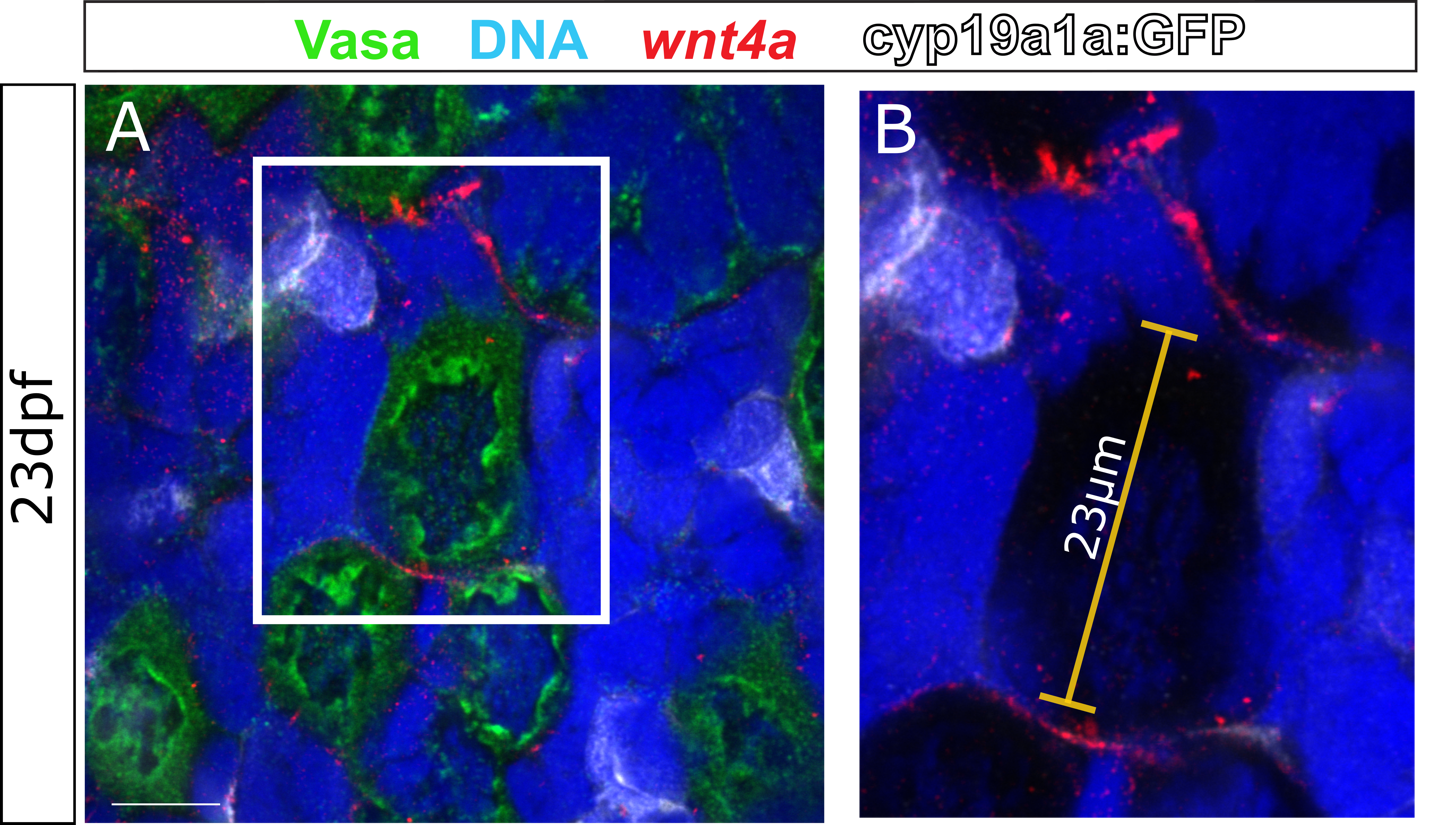


**Supplemental Figure 2. *wnt4a* is expressed in somatic cells that surround stage IB oocytes in 23dpf female zebrafish.** A. Confocal micrographs showing *wnt4a* RNA-expressing somatic gonadal cells (red) are closely associated with Vasa-expressing (green) oocytes. Wnt4a does not appear to be expressed in theca cells, which express Tg(*cyp19a1a:egfp*) (white, n=3). Red staining that overlaps with white was consistent with the background staining see throughout the tissue. B. In a simplified magnified view outlined in A, *wnt4a* localizes to the somatic cells adjacent to an oocyte with a diameter of 23µm. Expression of *wnt4a* is found consistently in somatic cells of stage IB oocytes that are >20µm in diameter. Nuclei are stained blue. Scale bar in A, 10µm).


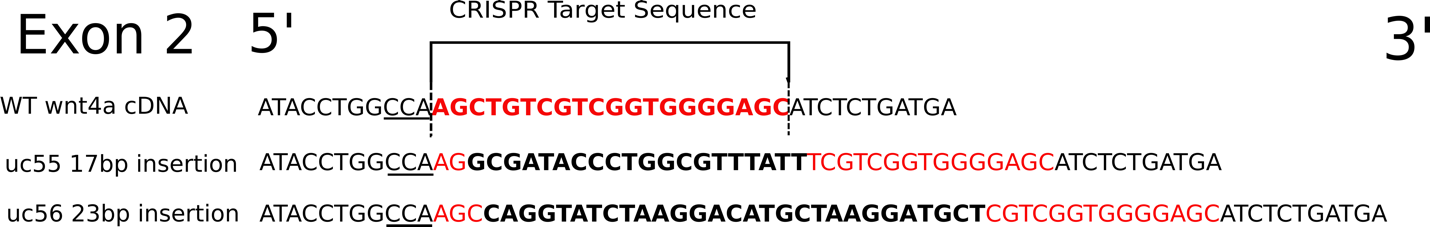


**Supplemental Figure 3. CRISPR/Cas9 mutant allele generation**. *wnt4a(uc55)* and *wnt4a(uc56)* were both generated by targeting the highlighted sequence (red) of Exon two. Mutagenesis resulted in 17bp (uc55) or 23bp (uc56) insertions (bold), PAM sequence (underlined).


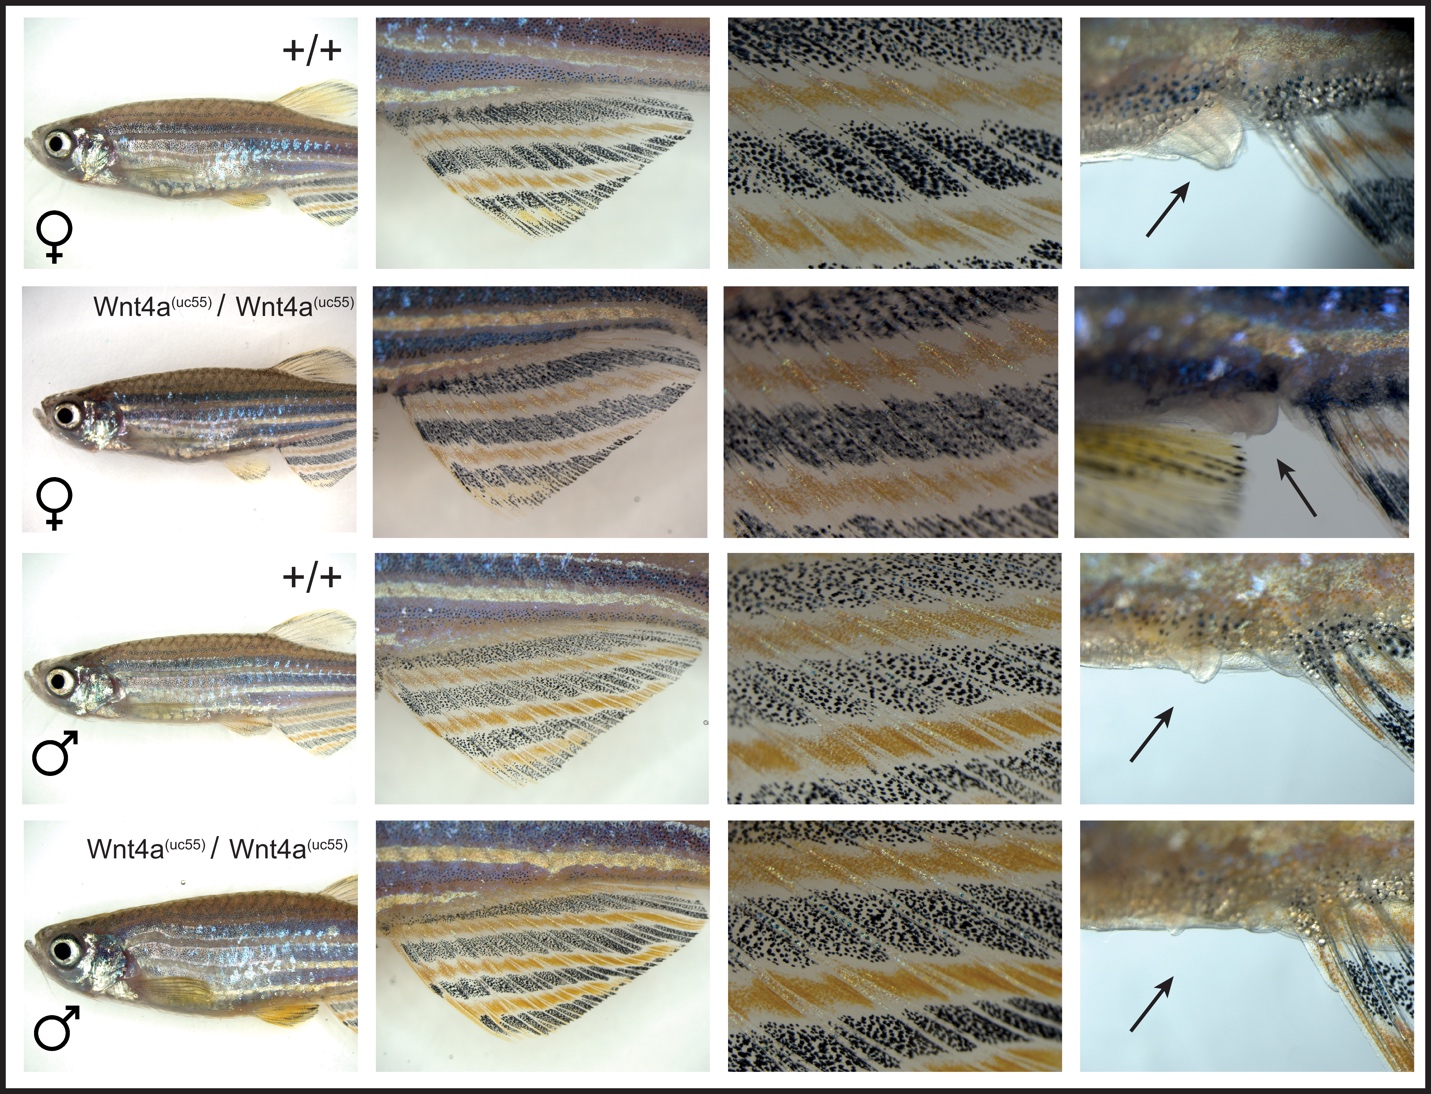


**Supplemental Figure 4. *wnt4a* mutant fish have normal secondary sexual characteristics.** Light micrograph pictures showing that the pigment patterns and body shapes of *wnt4a(uc55)* mutant females and males (B-B’” and D-D’”, respectively) are indistinguishable from their wild-type female and male siblings (A-A’” and C-C’”, respectively). Panels A-D compare of body shapes. B’-D’ and B”-D” are low and high magnification views, respectively, of anal fin pigmentation. Note that males have more yellow pigmentation than females. A’”-D’” show high magnification views of the genital orifice. Note that the genital orifice of females protrudes from the ventral body wall, while those of male do not (black arrow).

**
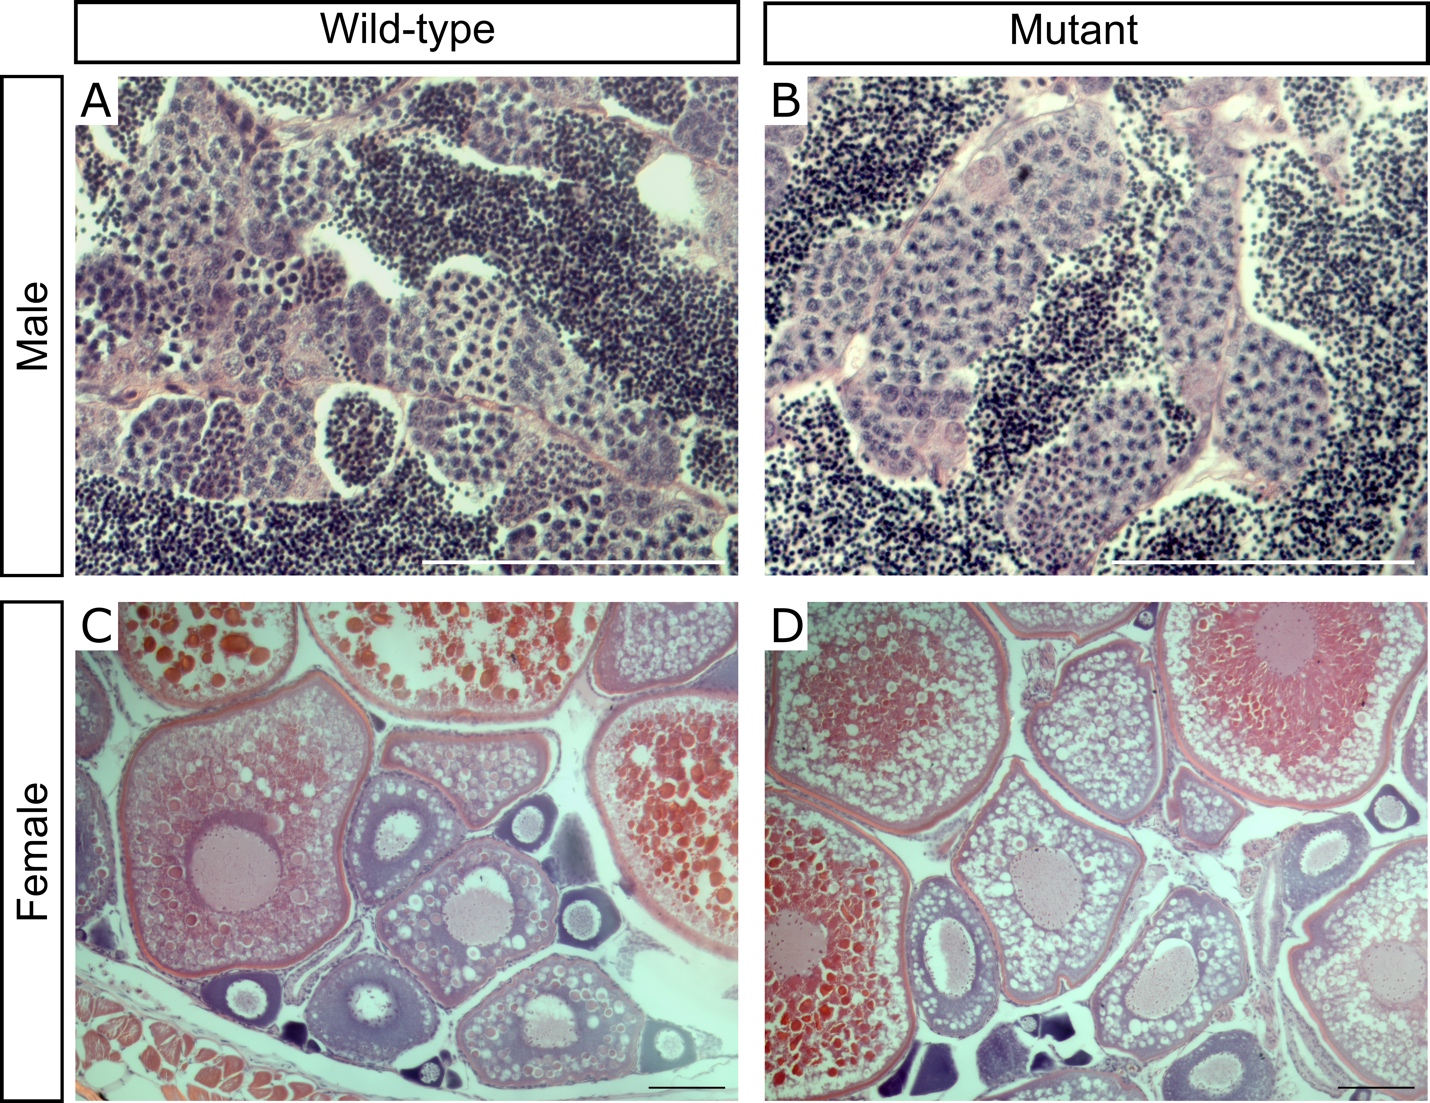
**

**Supplemental Figure 5. *wnt4a* mutant zebrafish have normal mature gonads.** Wild-type males (A) and *wnt4a* mutant males (B) at 90dpf both have all stages of spermatogenesis and are indistinguishable. Similarly, wild-type females (C) and *wnt4a* mutant females (D) have all stages of oogenesis and are indistinguishable. Scale: 1mm

**
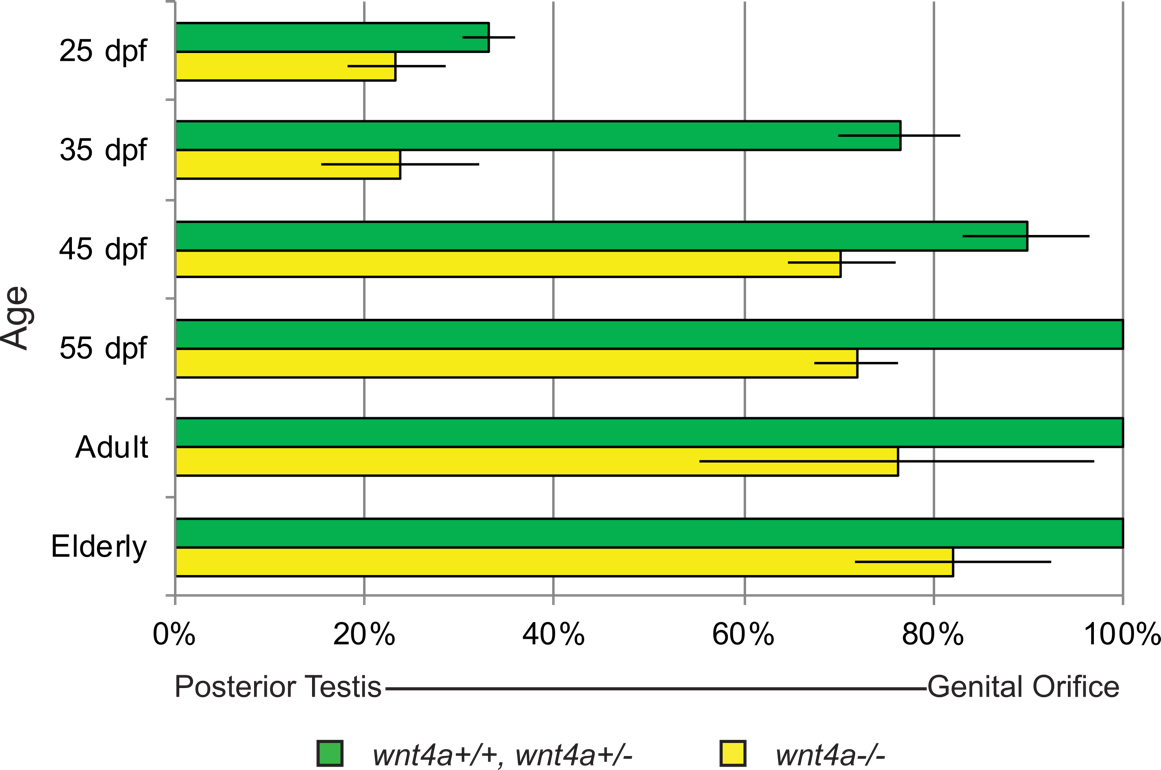
**

**Supplemental Figure 6. Growth of the male zebrafish reproductive duct over time.** Males were measured for duct elongation as a percentage of the distance between the posterior end of the testis and the genital orifice. Males were collected from 25dpf through 55dpf including adults and elderly (about 2 years old) for reference. Wild-type and *wnt4a* heterozygous males (green) had fully elongated reproductive ducts by 55dpf, while ducts in *wnt4a* mutants (yellow) never fully connected to the genital orifice.

**Supplemental File 1. 3D renderings of the male reproductive ducts.** WT male (left) develop a fused duct deferens which is absent in the mutant (right).

**Supplemental File 2. 3D renderings of the female reproductive ducts.** WT female (left) develop a complete oviduct which fails to connect to the genital orifice in the mutant (right).
